# Supplementary material for: Construction of mPt/ICG-αA nanoparticles with enhanced phototherapeutic activities for multidrug-resistant bacterial eradication and wound healing
Source: Royal Society of Chemistry journal article supplement (doi:10.1039/d3nr02010j), 2023-01-01
Supplement: d3nr02010j1.pdf [file d3nr02010j1.pdf]

## Electronic Supplementary Information

Construction of mPt/ICG- $\alpha$ A nanoparticles with enhanced phototherapeutic activities for multidrug-resistant bacteria eradication and wound healing

Lei Li,<sup>a</sup> Guoqing Zhu,<sup>a</sup> Wencheng Xu,<sup>a</sup> Man Wang,<sup>a</sup> Yulin Xie,<sup>a</sup> Zixian Bao,<sup>c</sup> Manlin Qi,<sup>\*b</sup> Minghong Gao,<sup>\*a</sup> and Chunxia Li<sup>\*a</sup>

<sup>a</sup>Institute of Molecular Sciences and Engineering, Institute of Frontier and Interdisciplinary Science, Shandong University, Qingdao 266237, P. R. China. E-mail: cxli@sdu.edu.cn, gaominghao@sdu.edu.cn

<sup>b</sup>Department of Oral Implantology, Jilin Provincial Key Laboratory of Tooth Development and Bone Remodeling, School and Hospital of Stomatology, Jilin University, Changchun 130021, P. R. China. E-mail: qiml20@mails.jlu.edu.cn

<sup>c</sup>State Key Laboratory of Microbial Technology, Shandong University, Qingdao 266237, P. R. China.

## Experiment Section

### Characterization

Utilizing an FEI Tecnai G2 S-Twin with a field emission gun operating at 200 kV, TEM images were captured. A D8 Focus diffractometer (Bruker) was used to test the X-ray diffraction (XRD) patterns. The UV-vis spectrophotometer UH5300 was used to test the UV-vis absorption spectra. A FLIR T420 thermal camera captured the photos in the thermal range. The cell viability was tested with a Microplate reader (Bio Tek-Elx800). The zeta potential was measured using a Zetasizer (NZS, Zetasizer Nano ZS). The fluorescence images were pictured through an inverted fluorescence microscope (MF53-N, China). The oxygen concentration was measured by a portable oxygen dissolver (JPB-607A).

### Bacterial culture

The monoclonal bacteria (*E. coli*, ATCC25922), *Staphylococcus aureus* (*S. aureus*, ATCC2923) on the Luria–Bertani (LB) solid medium was transferred to a 5 mL LB liquid medium and cultured at 37 °C at 200 rpm for 8 h to reach the logarithmic growth period.

### *In vitro* cytotoxicity

L929 cells purchased from Procell were seeded in DMEM medium supplemented with 10% FBS, penicillin (100 units mL<sup>-1</sup>), and streptomycin (100 µg mL<sup>-1</sup>) in 5% CO<sub>2</sub> at 37 °C. In 96-well plates, L929 cells were seeded and incubated overnight. Then, the culture medium was replaced with fresh medium containing mPIA and incubated for 24 h. MTT solution (10 µL) was applied to each well and incubated at 37 °C for 4 h. Finally, DMSO (0.2 mL) was added to each well, and the absorbance at 450 nm was determined using a microplate reader.

### Calculation of the photothermal conversion efficiency

The photothermal conversion efficiency was calculated by Eq. (1):

$$\eta = \frac{hS(T_{max,NP} - T_{surr}) - Q_{dis}}{I(1 - 10^{-A_{808}})} \quad (1)$$

where  $h$  is the heat transfer coefficient,  $S$  is the surface area of the vessel,  $T_{max}$  is the maximum temperature of the solution,  $T_{surr}$  is the ambient temperature,  $Q_{dis}$  is the heat generated by the absorption of light by water,  $I$  is the laser power density,  $A_{808}$  is the absorption value of the materials at 808 nm.  $hS$  can be calculated by Eq. (2) and (3):

$$Q_{dis} = hS(T_{max,H_2O} - T_{surr}) \quad (2)$$

$$\tau_s = \frac{m_D C_D}{hS} \quad (3)$$

where  $m_D$  is the mass of H<sub>2</sub>O and  $C_D$  is the heat capacity of H<sub>2</sub>O,  $\tau_s$  is the fitted time constant, calculated by Eq. (4) and (5):

$$t = -\tau_s \ln \theta \quad (4)$$

$$\theta = \frac{T_{surr} - T}{T_{surr} - T_{max}} \quad (5)$$

where  $t$  is the cooling time,  $T$  is the temperature at cooling  $t_s$ , and  $\theta$  is a dimensionless dynamic temperature introduced to calculate  $\tau_s$ .

### Statistical Analysis

Experiments were performed at least three times and results were expressed as means  $\pm$  SD. Statistical significances were analyzed using the student's t-test and one-way analysis of variance (\* $p < 0.05$ , \*\* $p < 0.01$ , \*\*\* $p < 0.001$ ).

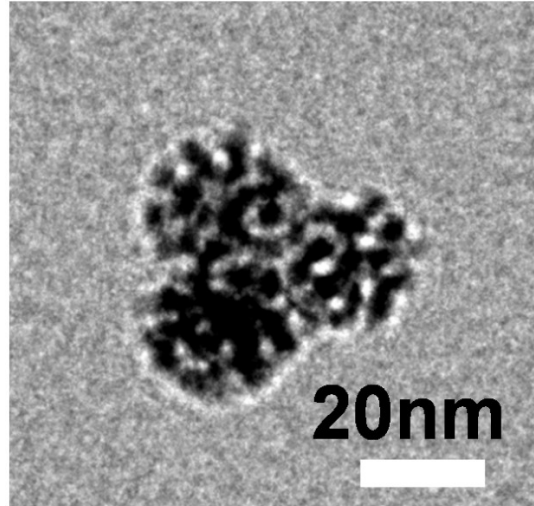

Fig. S1 TEM image of mPt

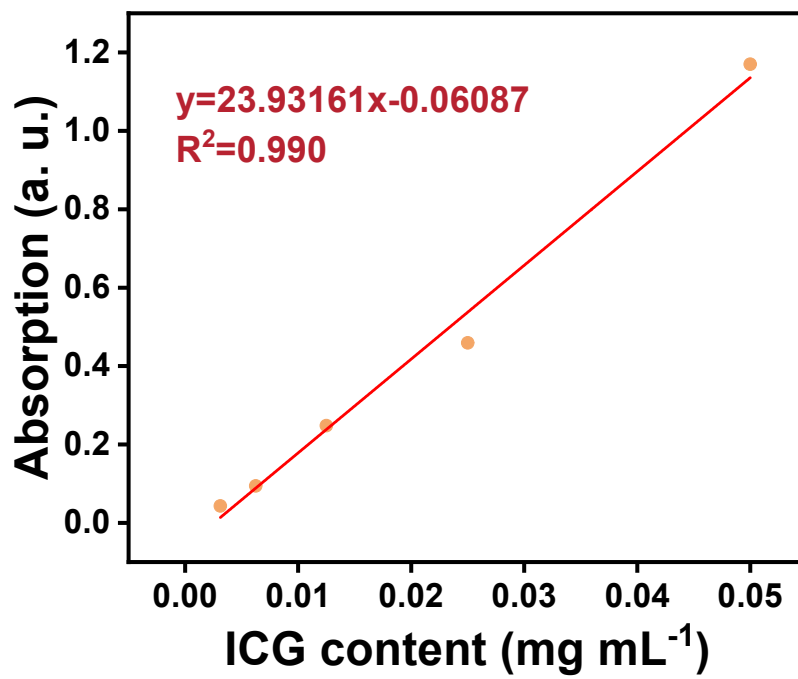

Fig. S2 The standard curve of ICG.

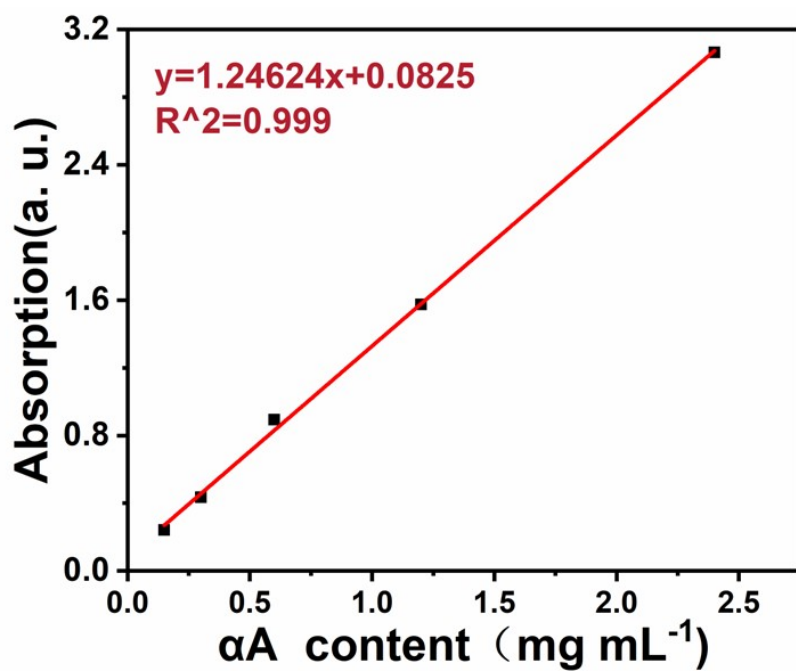

**Fig. S3** The standard curve of Bradford protein assay kit for calculating the encapsulation rate of  $\alpha A$ .

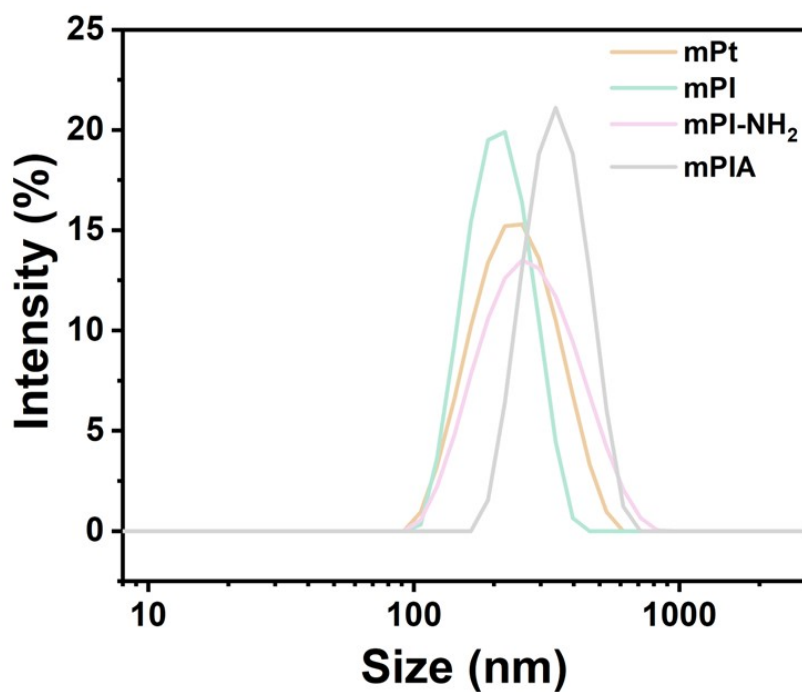

**Fig. S4** The DLS data of mPt NPs, mPI NPs, mPI-NH<sub>2</sub>, and mPIA NPs.

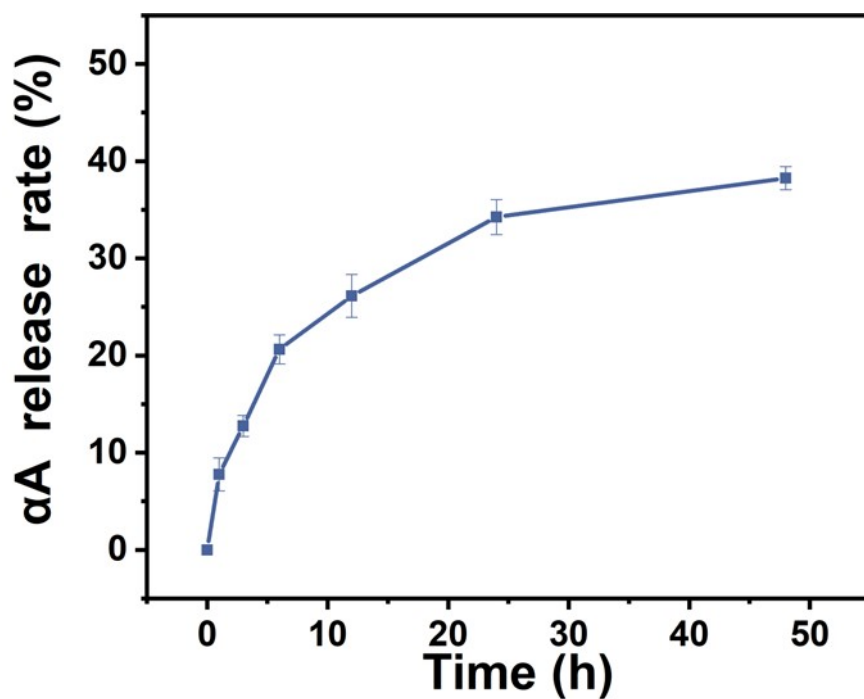

Fig. S5 The release rate of  $\alpha$ -amylase.

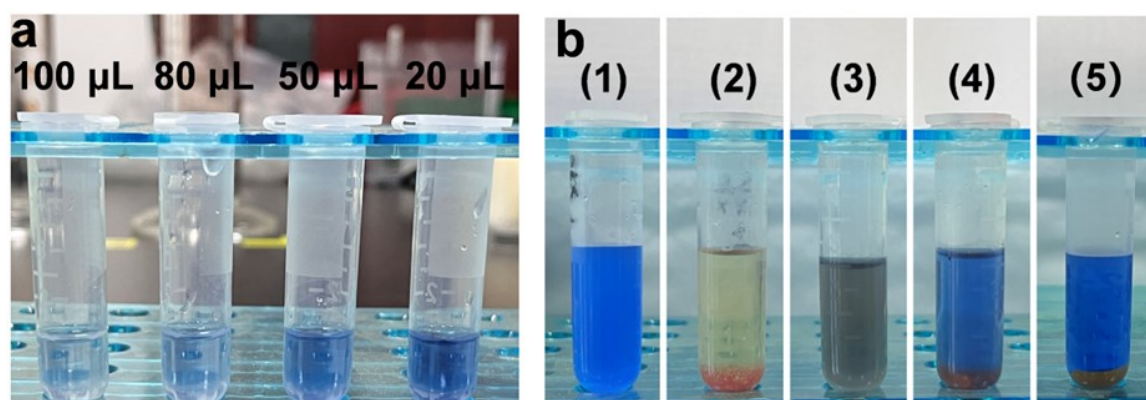

Fig. S6 (a) Iodine solution combined with starch solution with different amounts of  $\alpha$ -amylase. (b) Starch solution with Fehling's reagent (1) Fehling's reagent and  $\alpha$ -amylase (2) mPIA (3) Fehling's reagent,  $\alpha$ -amylase and mPIA (4) Fehling's reagent and mPIA two days after release (5)

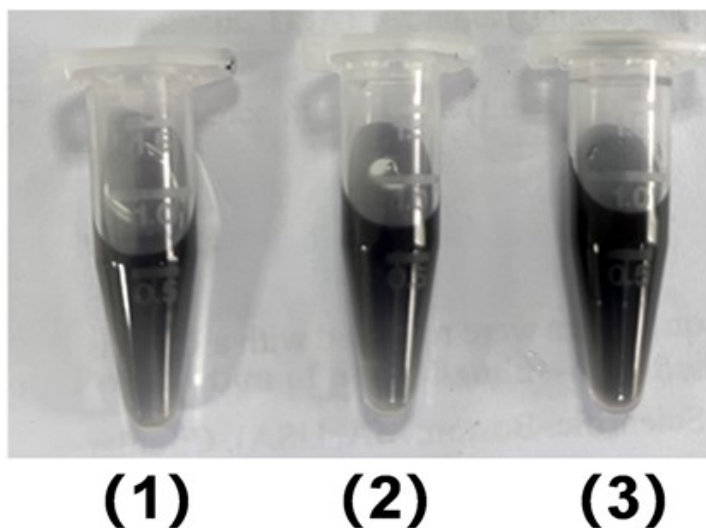

**Fig. S7** The photograph of mPIA dispersed in H<sub>2</sub>O(1), PBS(2) Luria-Bertani (LB) medium (3).

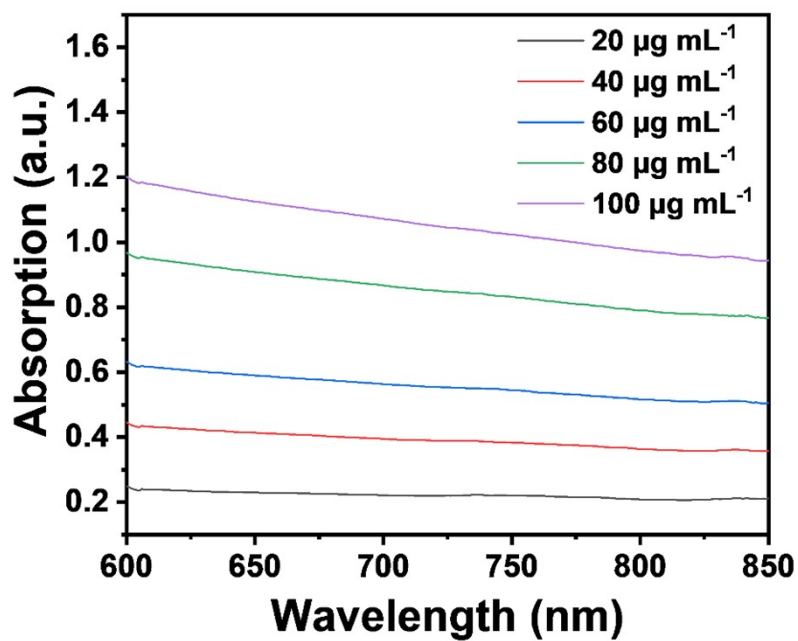

**Fig. S8** Absorbance spectra of mPIA NPs solution with different concentrations.

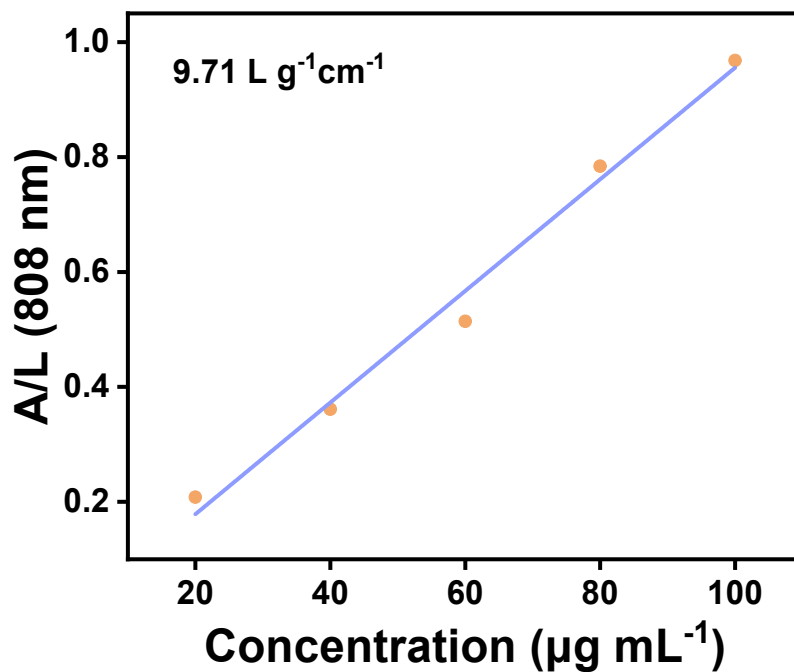

Fig. S9 The mass extinction coefficient of mPIA NPs.

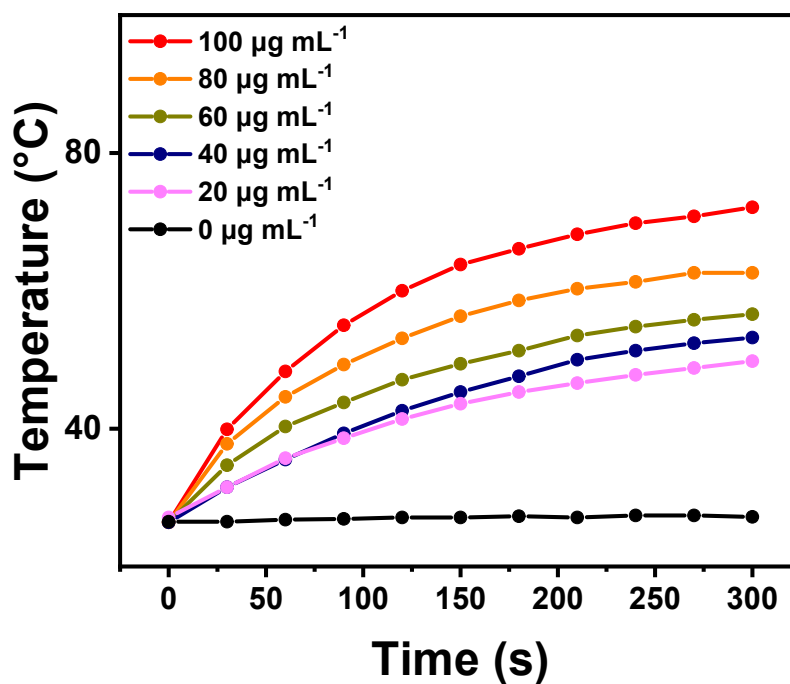

Fig. S10 Temperature changes of mPt NPs with various concentrations under the laser power density of 1.0 W cm<sup>-2</sup> (808 nm laser for 5 min).



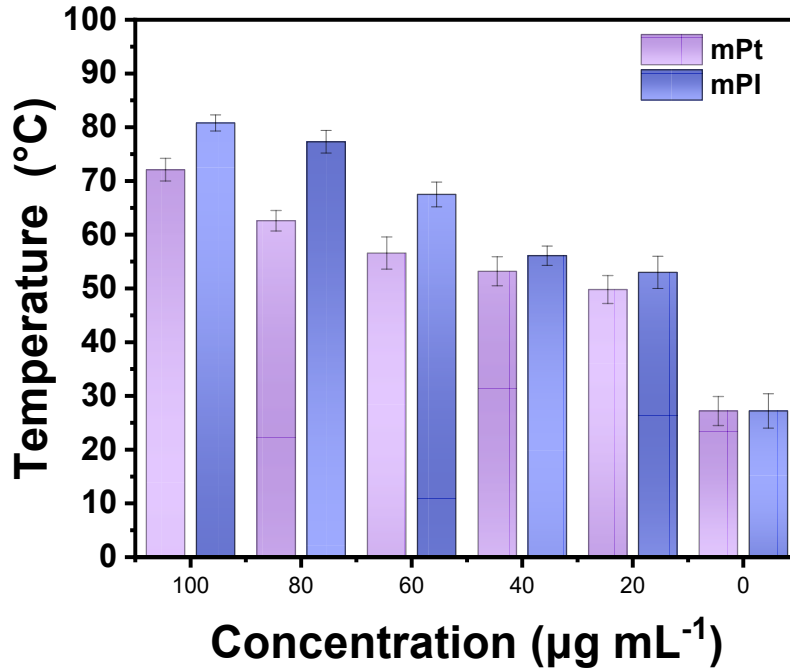

**Fig. S11** Comparison of the maximum temperature of mPt NPs and mPI NPs at different concentrations after irradiation at 808 nm for 5 min.

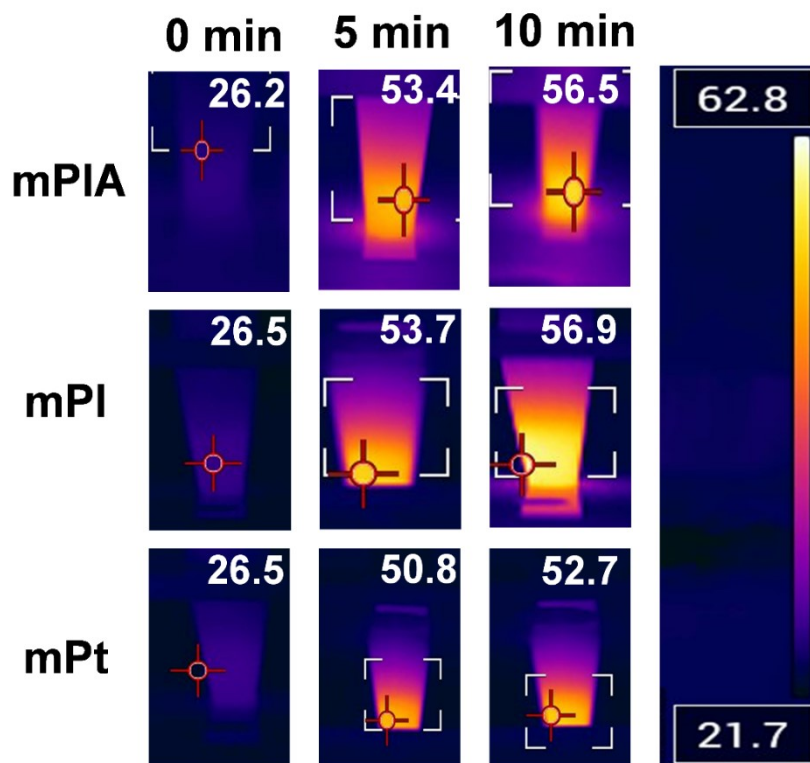

**Fig. S12** Temperature generated by mPt/mPI/mPIA ( $25\mu\text{g mL}^{-1}$ ) after exposure to 808nm laser with  $1.0\text{ W cm}^{-2}$  for 10 min.

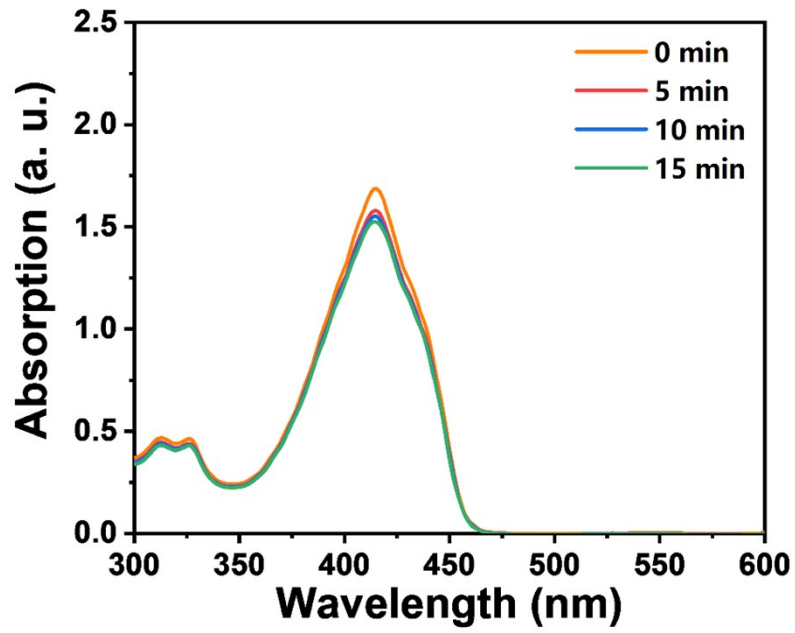

**Fig. S13** The UV-vis absorption spectra of DPBF under 808 nm laser irradiation for different time.

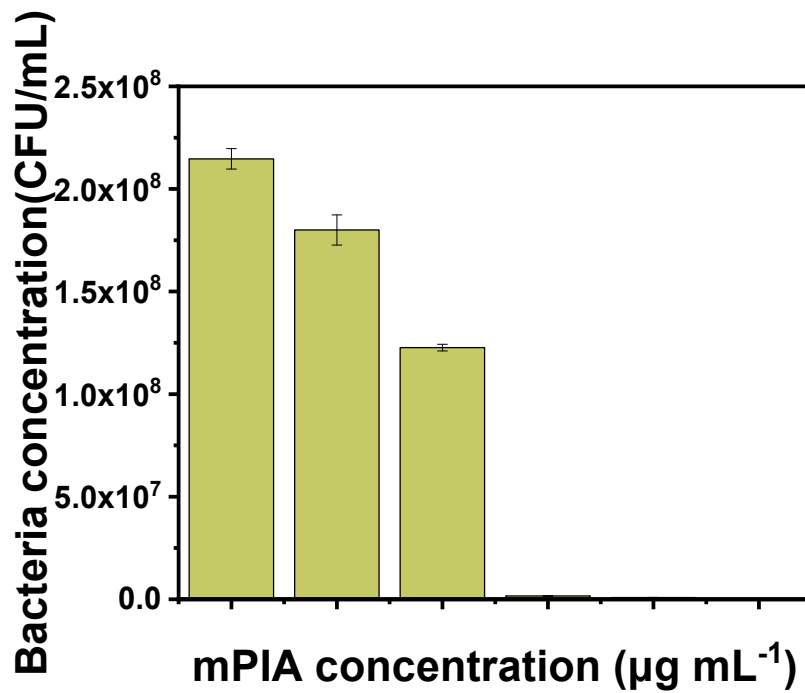

**Fig. S14** Colony counting assays of *Escherichia coli* exposed to different concentrations of mPIA. The results were expressed as mean  $\pm$  SD (n = 3, \*\*\*p < 0.001, \*\*p < 0.01).

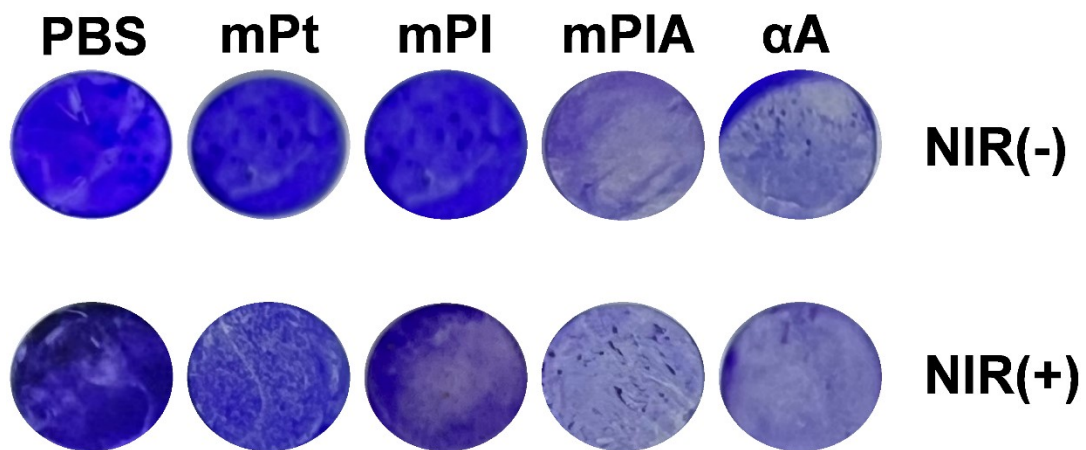

Fig. S15 The hole plate images of the biofilms stained with crystal violet.

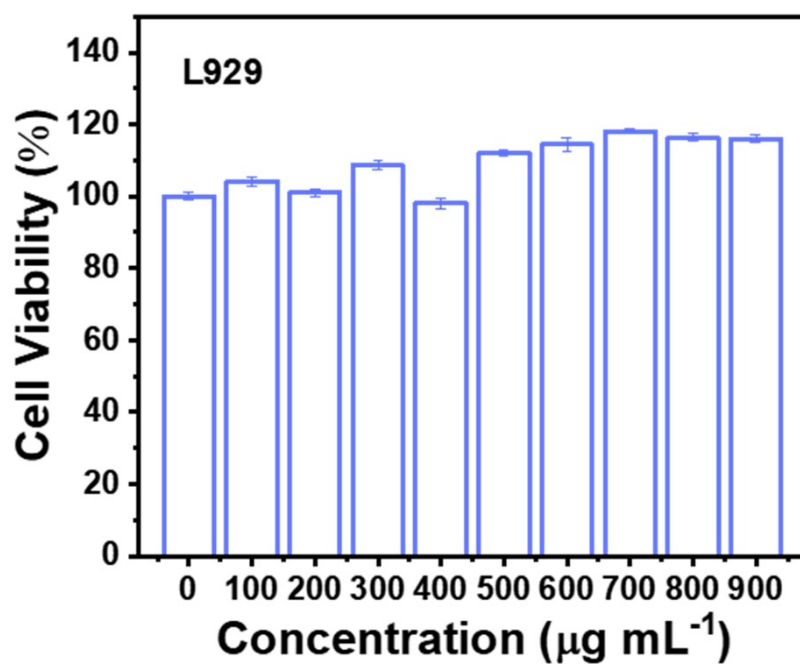

Fig. S16 Cell viability of L929 cells after incubated with mPIA NPs for 24 h.

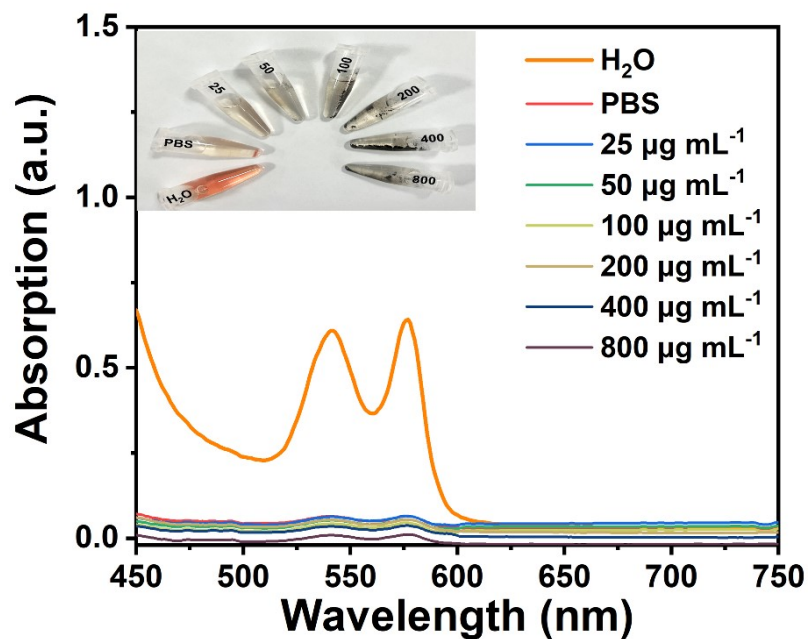

Fig. S17 Hemolytic tests of mPIA NPs at different concentrations.

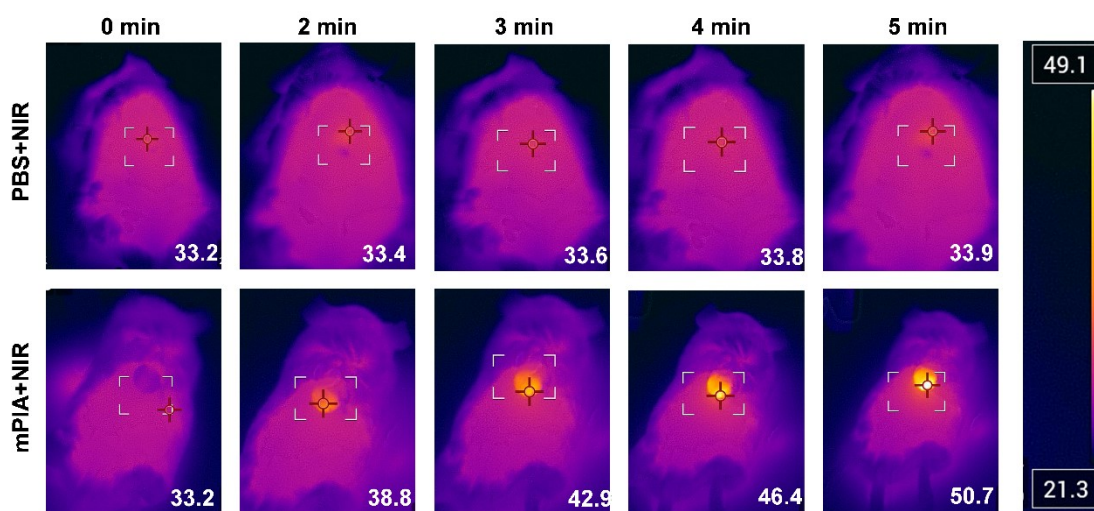

Fig. S18 Thermal images of mice injected with PBS (0.01 M, pH 7.4, 100  $\mu$ L) and mPIA NPs (25  $\mu$ g mL<sup>-1</sup>, 100  $\mu$ L) under 808 nm NIR irradiation (0.5 W cm<sup>-2</sup>) for 5 min.

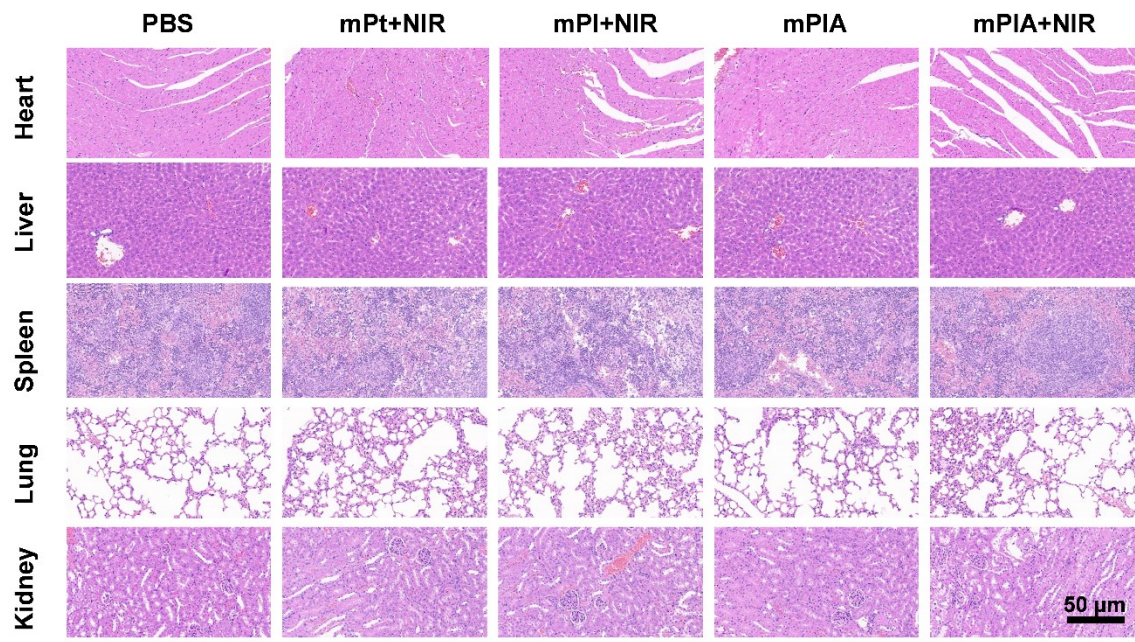

**Fig. S19** The H&E stained images of mice major organs under the different treatments.
